# Supplementary material for: Accelerated HF-rTMS Modifies SERT Availability in the Subgenual Anterior Cingulate Cortex: A Canine [11C]DASB Study on the Serotonergic System
Source: MDPI journal article supplement (doi:10.3390/jcm11061531), 2022-03-10
Supplement: s1 [file s1]

## Supplemental materials

**Supplemental Table S1.** Statistics for contrasts within three treatment groups.

|    | 5 Sessions Active - 20 Sessions Sham |       |         |         | 20 Sessions Active – 20 Sessions Sham |       |         |         | 5 Sessions Active - 20 Sessions Active |       |         |         |
|----|--------------------------------------|-------|---------|---------|---------------------------------------|-------|---------|---------|----------------------------------------|-------|---------|---------|
|    | Estimate                             | SE    | z-ratio | p-value | Estimate                              | SE    | z-ratio | p-value | Estimate                               | SE    | z-ratio | p-value |
| T0 | -0.2561                              | 0.204 | -1.254  | 0.6295  | 0.2675                                | 0.215 | 1.243   | 0.6421  | 0.0115                                 | 0.160 | 0.072   | 1.0000  |
| T1 | -0.2247                              | 0.216 | -1.038  | 0.8978  | 0.0160                                | 0.219 | 0.073   | 1.0000  | 0.2407                                 | 0.163 | 1.475   | 0.4206  |
| T2 | -0.1745                              | 0.203 | -0.861  | 1.0000  | 0.0535                                | 0.211 | 0.254   | 1.0000  | 0.2280                                 | 0.152 | 1.503   | 0.3982  |
| T3 | -0.3398                              | 0.194 | -1.748  | 0.2415  | 0.3096                                | 0.204 | 1.515   | 0.3892  | 0.0302                                 | 0.152 | 0.199   | 1.0000  |

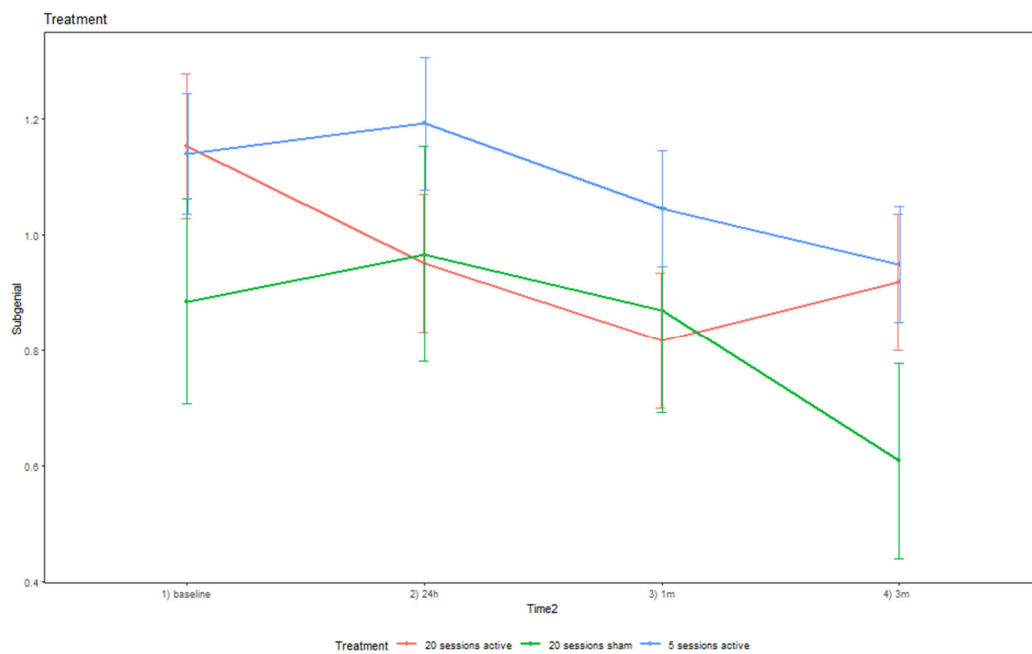

**Supplemental Figure S1.** Line plot for sgACC for three treatment groups at each individual time moment. SE's are displayed as error bars.
